# Supplementary material
Source: publisher figshare collection journal article supplement (https://karger.figshare.com/ndownloader/files/31519124)
Supplement: Supplementary file 1 [file 31519124]

| **Criteria used to assess the quality of qualitative studies** | **Studies a** | | | | | | | |
| --- | --- | --- | --- | --- | --- | --- | --- | --- |
| **1** | **6** | **10** | **12** | **14** | **15** | **20** | **23** |
| **Quality of reporting** | | | | | | | | |
| Were the aims and objectives clearly reported? | 1 | 1 | 1 | 1 | 1 | 1 | 1 | 1 |
| Was there an adequate description of the context in which the research was carried out? | 1 | 1 | 1 | 1 | 1 | 0 | 1 | 1 |
| Was there an adequate description of the sample and the methods by which the sample was identified and recruited? | 1 | 1 | 1 | 0 | 0 | 1 | 0 | 1 |
| Was there an adequate description of the methods used to collect data? | 1 | 1 | 1 | 1 | 1 | 1 | 1 | 1 |
| Was there an adequate description of the methods used to analyze data? | 0 | 0 | 0 | 0 | 1 | 1 | 1 | 1 |
| **Use of strategies to increase reliability and validity** | | | | | | | | |
| Were there attempts to establish the reliability of the data collection tools (for example, by use of interview topic guides)? | 1 | 0 | 0 | 0 | 0 | 0 | 0 | 1 |
| Were there attempts to establish the validity of the data collection tools (for example, with pilot interviews)? | 0 | 0 | 0 | 0 | 0 | 1 | 0 | 1 |
| Were there attempts to establish the reliability of the data analysis methods (for example, by use of independent coders)? | 0 | 0 | 0 | 0 | 0 | 0 | 0 | 1 |
| Were there attempts to establish the validity of data analysis methods (for example, by searching for negative cases)? | 0 | 0 | 0 | 0 | 0 | 1 | 0 | 0 |
| **Extent to which study findings reflected young people perspectives and experiences** | | | | | | | | |
| Did the study use appropriate data collection methods for helping participants to express their views? | 0 | 0 | 1 | 0 | 0 | 1 | 0 | 1 |
| Did the study use appropriate methods for ensuring the data analysis was grounded in the views of participants? | 0 | 0 | 0 | 0 | 0 | 0 | 0 | 1 |
| Did the study actively involve proper participants in its design and conduct? | 1 | 1 | 1 | 1 | 1 | 1 | 1 | 1 |
|  | 6 | 5 | 6 | 4 | 5 | 8 | 5 | 11 |

a The number of studies is according to the number of studies in table 1 (characteristics of the studies)

1: to have the criteria 0: not to have the criteria
